# Supplementary material
Source: PubMed Central journal article supplement (PMC2580789)

# S Figure 1

**A**

Polβ HKIKSGAEAKKLPGVG**T**KIAEKID**E**FLATG  
 Polι HLIHSLNHIKEIPGIGYK**T**A-K**C**LEALGIN  
 \* \* : \* \* . \* : : \* \* : \* \* \* \* \* \* \* \* . : .  
 H1 h H2

Polι -HLI**H**SLNHIKEIPGIG-Y**K**TAK**C**LEAL  
 Polη MD**F**IKD**L**P-IR**K**VSGIG-K**V**TE**K**ML**K**AL  
 Polκ -Q**L**F**S**Q**M**P-IR**K**IRSLGG**K**LGAS**V**IEIL  
 . : : . : \* : : : . : \* . : : \*

Polβ HKIKSGAEAKKLPGVG**T**KIAEKID**E**FLATG  
 Polλ KP**V**TSY**Q**E**A**CSIPGIG**R**MAEK**I**IE**I**LES  
 : : . \* \* \* . : \* \* : \* \* \* \* \* \* \* \* \* \* : :

**B**

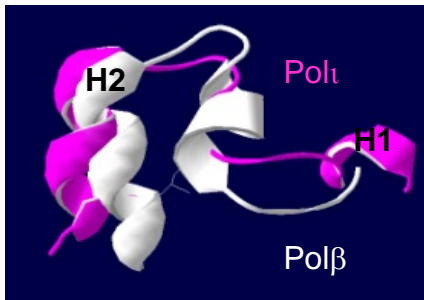

S Figure 2

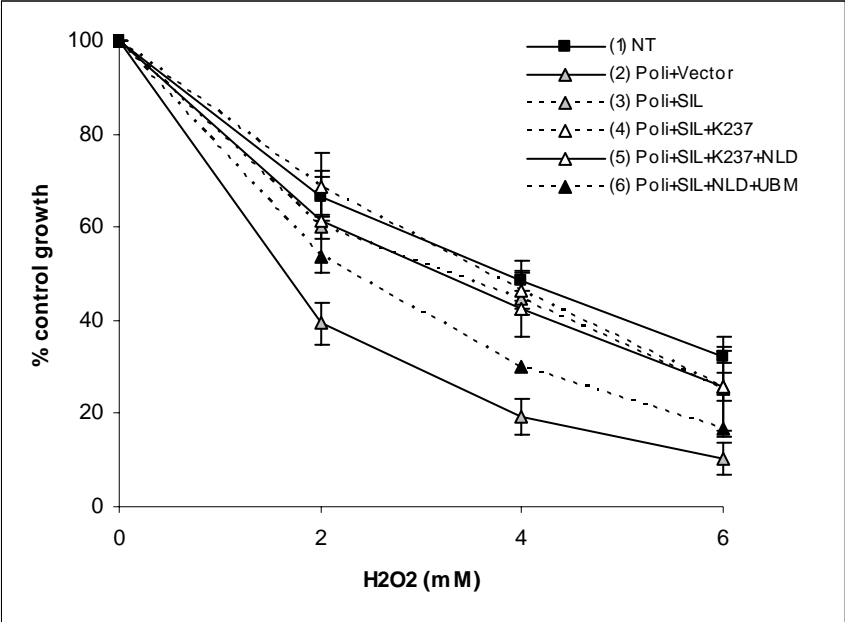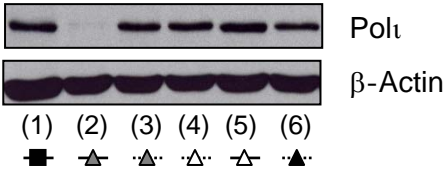

**S Figure 3**

**A**

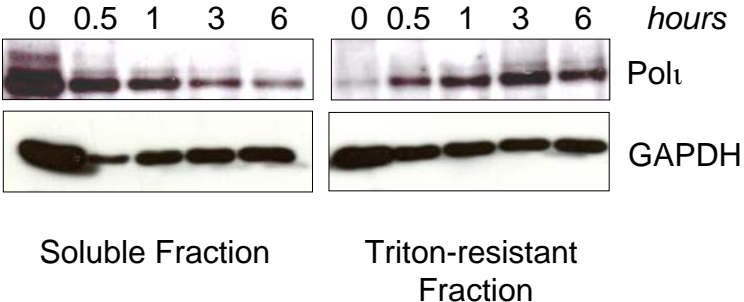

**B**

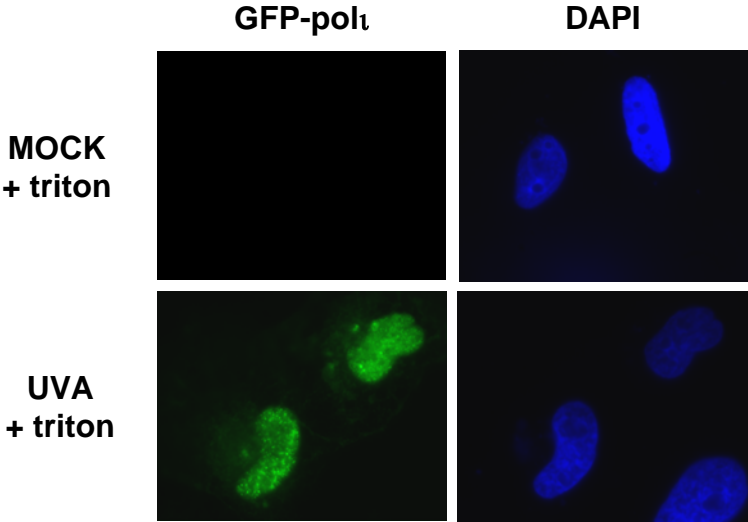

Supplement: emboj2008210s1.pdf [file emboj2008210s1.pdf]
